# Supplementary material for: New mixed-valence MnII2MnIII2clusters exhibiting an unprecedented MnII/IIIoxidation state distribution in their magnetically coupled cores
Source: Royal Society of Chemistry journal article supplement (doi:10.1039/b511817d), 2005-12-22
Supplement: b511817d.pdf [file b511817d.pdf]

## Supplementary Data

### Complex 2

Complex 2 (Figure S1) showed a  $\mu_{\text{eff}}$  value of  $10.9 \mu_{\text{B}}$  at 300 K which is close to the expected value associated with the sum of the {two spin 5/2 + two spin 4/2} sites ( $10.86 \mu_{\text{B}}$ ). The sample showed a gradual increase in  $\mu_{\text{eff}}$  between 20 and 100 K, then the moments became almost temperature independent above 100 K. The  $\chi_M$  versus temperature plot was Curie-Weiss like in shape with no distinct max. at low temperature indicative of antiferromagnetic coupling. High field magnetisation isotherms (2 to 20 K,  $H=0$  to 5 T) were measured to try to identify the ground state and are shown in Figure S2. Saturation in  $M$  was not achieved at 2 K and 5 T, the  $M$  value under these conditions being  $8.8 N\mu_{\text{B}}$ ; it appears that saturation might occur above fields of 5 T. From the data obtained a ground state of  $S_{\text{T}} \sim 4$  is suggested.

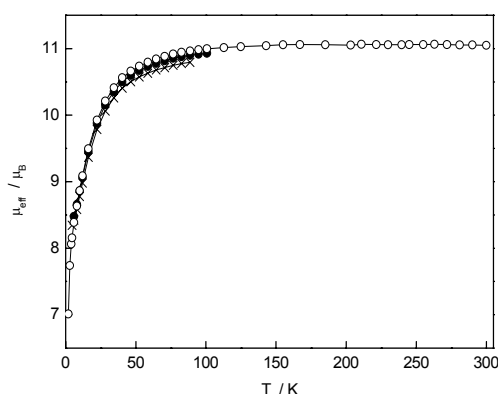

**Fig. S1** Plots of magnetic moment versus temperature (300 – 2 K) for complex 2 in applied fields of 1 (O), 0.1 (●) and 0.01 T (X). The latter two fields were measured only in the range 100 – 4.2 K. The solid line just joins the points.

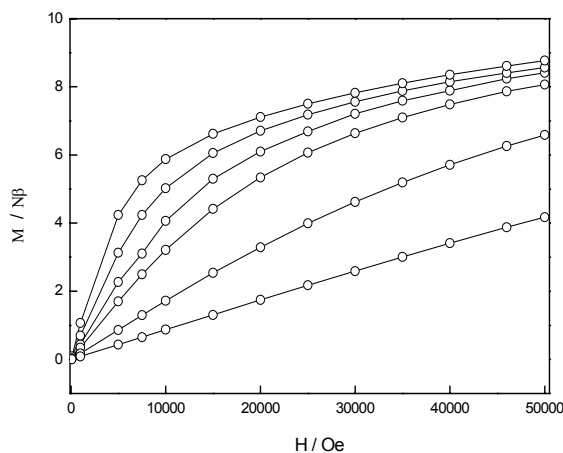

**Fig. S2** Magnetisation versus field plots for complex 2 at temperatures of 2, 3, 4, 5.5, 10 and 20 K (top to bottom). The solid lines just join the points

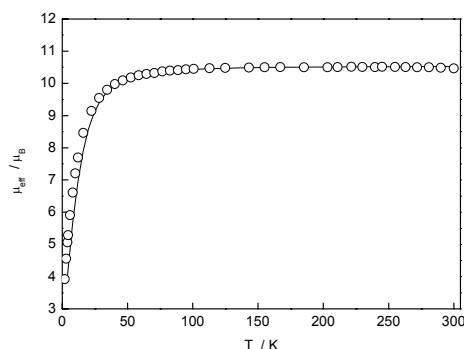

**Fig. S3** Plots of magnetic moment *versus* temperature (300 – 2 K) for complex **3** in a field of 1 T. The solid line represents the best fit parameters:  $g = 1.94$ ,  $J_{wb} = -0.8 \text{ cm}^{-1}$  and  $J_{bb} = +2.1 \text{ cm}^{-1}$ .

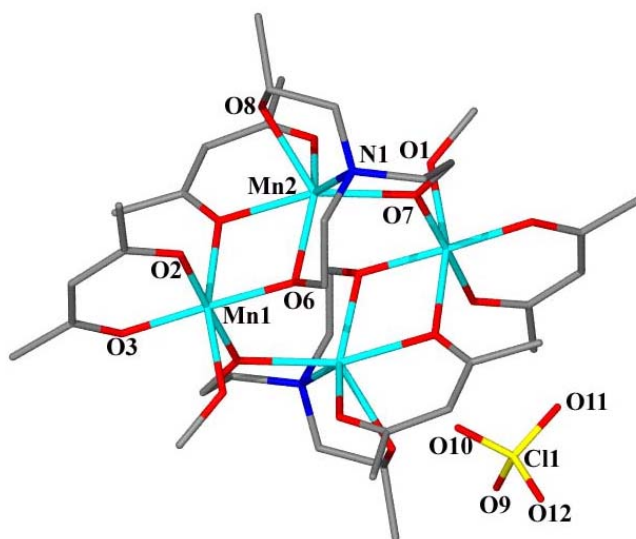

**Fig. S4** Structure of **4**

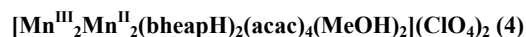

The asymmetric unit of complex **4** contains half the cluster and a perchlorate counterion. The [Mn<sub>4</sub>(bheapH)<sub>2</sub>(acac)<sub>4</sub>(MeOH)<sub>2</sub>] cluster of **4** is shown in Figure S4. The peripheral Mn<sup>III</sup> ions, Mn(1), are six coordinate with distorted octahedral geometry, showing the expected Jahn-Teller elongation in the form of an elongation of the O(1) – Mn(1) – O(4) axis (2.311(2) and 2.314(2) Å respectively). The central body Mn atoms, Mn(2), are also six coordinate, exhibiting distorted trigonal prismatic geometry, although a significant interaction between Mn(2) and the face capping O(1<sup>′</sup>) atom at a distance of ~ 2.62 Å forms a seven coordinate environment (commonly observed for Mn<sup>II</sup> ions). Bond length analysis and BVS calculations were used to confirm the oxidation states of Mn(1) and Mn(2). All three arms of the doubly deprotonated bheapH<sup>2-</sup> anions in **4** partake in bonding. Two arms link the wing-tip Mn<sup>III</sup> ions (Mn(1)) to the central body Mn<sup>II</sup> ions (Mn(2)) through  $\mu_2$ -bridges (*via* O(6) and O(7)) (Fig. S4) while the third arm, O(8), remains protonated, preferring to bond terminally to Mn(2), as does its amine nitrogen atom, N(1). Four acac<sup>-</sup> anions are present in the structure and show two different bonding modes. While the first exhibits its traditional chelating mode (to Mn(1)), the second acac<sup>-</sup> anion

bridges the peripheral Mn<sup>III</sup> ions (Mn(1)) to the central body Mn<sup>II</sup> ions (Mn(2)) *via* a  $\mu_2$ -bridge from one of its oxygen atoms, O(5), while the second oxygen, O(4), bonds terminally to Mn(2) (Fig. S4) . The coordination geometries at the wing-tip Mn positions (Mn(1)) are completed by terminal MeOH molecules. The ClO<sub>4</sub><sup>-</sup> counter ions are hydrogen bonded to the protonated arm of the bheapH<sup>2-</sup> ligand (O(8)...O(10) 2.759 Å). There are no hydrogen bonds between neighbouring clusters.
